# Supplementary material
Source: Elsevier journal article supplement (https://www.sciencedirect.com/science/article/pii/S002175572100142X)

**JPED-D-21-00196 – Supplementary Material**

**Figure 1 - Flow chart of the sampling and the biochemical parameters Sample collection.**


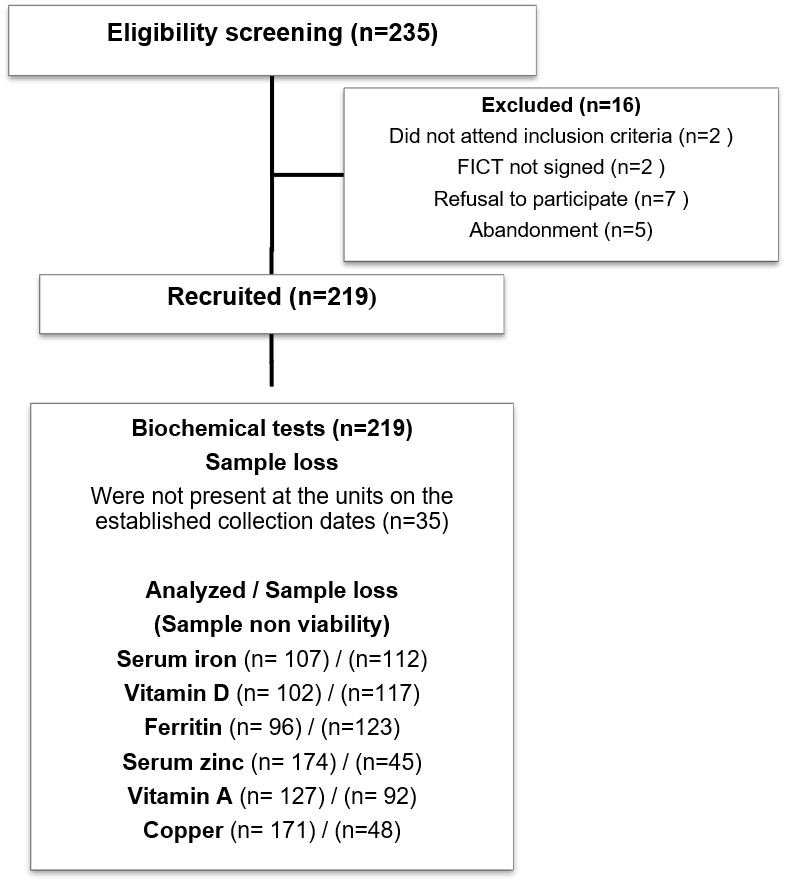


**Figure 2 - Graph showing the correlations between the variables weight, height, body mass index (BMI), cranial circumference (CC), arm circumference (AC), iron, ferritin, vitamin D (VITD), vitamin A (VITA), copper and zinc.**


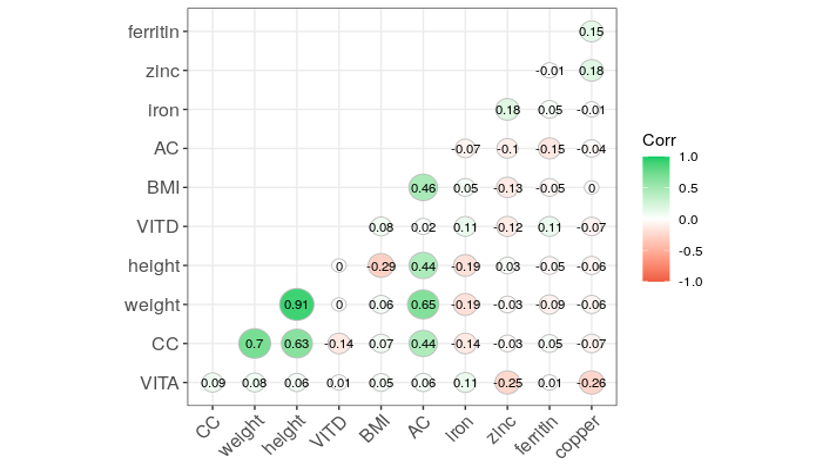

Supplement: mmc1 [file S002175572100142X:mmc1.docx]
